# Supplementary material for: Stabilizing heterochromatin by DGCR8 alleviates senescence and osteoarthritis
Source: PubMed Central journal article supplement (PMC6659673; doi:10.1038/s41467-019-10831-8), 2019-07-26
Supplement: 41467_2019_10831_MOESM3_ESM.pdf [file 41467_2019_10831_MOESM3_ESM.pdf]

## Description of Additional Supplementary Files

**File Name:** Supplementary Data 1

**Description:** The list and sequences of primers used for qPCR, semi-qPCR, CHIP-qPCR, and PCR.

**File Name:** Supplementary Data 2

**Description:** The list and sequences of sgRNAs.

**File Name:** Supplementary Data 3

**Description:** The list and sequences of shRNAs.

**File Name:** Supplementary Data 4

**Description:** Information on dental pulp-derived primary hMSCs.

**File Name:** Supplementary Data 5 (corresponding to Supplementary Figure 3c)

**Description:** The list of differentially expressed miRNAs between WT and DR8<sup>dex2</sup> hMSCs.

**File Name:** Supplementary Data 6

**Description:** The list of interacting proteins of DGCR8 identified by mass spectrometry.

**File Name:** Supplementary Data 7 (corresponding to Figure 8b)

**Description:** The list of downregulated and upregulated genes by RNA-seq of non-invasive mouse joints and ACLT joints treated with lentiviruses expressing DR8-WT or DR8-mtDRBD, compared with ACLT joints treated with lentiviruses expressing Luc.
